# Supplementary material for: Impact of Road Traffic Pollution on Pre-eclampsia and Pregnancy-induced Hypertensive Disorders
Source: PubMed Central journal article supplement — Epidemiology. 2016 Nov 30;28(1):99–106. doi: 10.1097/EDE.0000000000000555 (PMC5380106; doi:10.1097/ede.0000000000000555), 2016-11-30
Supplement: ede-28-099-s001.pdf [file ede-28-099-s001.pdf]

**etable 1.** Study Population Characteristics of Excluded Pregnancies (N=26,181).

|                                                           | Missing<br>(n)             | Excluded (%)<br>P50 (P5-P95) | Included (%)<br>P50 (P5-P95) | P <sup>a</sup> |
|-----------------------------------------------------------|----------------------------|------------------------------|------------------------------|----------------|
| Preeclampsia (all subtypes)                               | 2,303                      | 2.7                          | 2.6                          | 0.57           |
| Mild preeclampsia                                         | 2,500                      | 1.8                          | 1.9                          | 0.39           |
| Severe preeclampsia                                       | 524                        | 0.8                          | 0.7                          | 0.10           |
| Early-onset preeclampsia                                  | 2,303                      | 1.1                          | 0.9                          | 0.004          |
| Late-onset preeclampsia                                   | 2,303                      | 1.5                          | 1.7                          | 0.12           |
| Gestational hypertension                                  | 1,097                      | 1.4                          | 1.1                          | <0.001         |
| Hypertensive disorders in pregnancy (all subtypes)        | 2,847                      | 3.9                          | 3.3                          | <0.001         |
| Parity                                                    | 10,758                     |                              |                              |                |
|                                                           | Nulliparous                | 28.6                         | 50.8                         |                |
|                                                           | Multiparous                | 71.4                         | 49.2                         | <0.001         |
| Pre-pregnancy body mass index (BMI)                       | 12,202                     |                              |                              |                |
|                                                           | <18.5 kg/m <sup>2</sup>    | 4.3                          | 4.6                          |                |
|                                                           | ≥18.5-25 kg/m <sup>2</sup> | 63.2                         | 68.6                         |                |
|                                                           | ≥25-30 kg/m <sup>2</sup>   | 21.6                         | 19.1                         |                |
|                                                           | ≥30 kg/m <sup>2</sup>      | 10.2                         | 7.7                          | <0.001         |
| Disposable income                                         | 1,449                      |                              |                              |                |
|                                                           | Low                        | 20.1                         | 19.8                         |                |
|                                                           | Middle                     | 31.0                         | 30.8                         |                |
|                                                           | High                       | 48.9                         | 49.5                         | 0.25           |
| Education                                                 | 1,948                      |                              |                              |                |
|                                                           | Low                        | 16.3                         | 16.1                         |                |
|                                                           | Middle                     | 49.2                         | 53.0                         |                |
|                                                           | High                       | 34.5                         | 31.0                         | <0.001         |
| Season of conception                                      | 702                        |                              |                              |                |
|                                                           | January-March              | 24.3                         | 24.6                         |                |
|                                                           | April-June                 | 24.9                         | 23.8                         |                |
|                                                           | July-September             | 25.8                         | 25.4                         |                |
|                                                           | October-December           | 25.0                         | 26.1                         | <0.001         |
| Smoking in early pregnancy                                | 10,770                     |                              |                              |                |
|                                                           | None                       | 78.3                         | 73.1                         |                |
|                                                           | Occasional                 | 21.8                         | 26.9                         | <0.001         |
| Physical activity in early pregnancy                      | 11,017                     |                              |                              |                |
|                                                           | None                       | 68.1                         | 62.5                         |                |
|                                                           | Some                       | 31.9                         | 37.5                         | <0.001         |
| Age (years)                                               | 25,479                     | 29.8 (23.0-37.7)             | 29.4 (22.8-37.0)             | <0.001         |
| Height (cm)                                               | 15,357                     | 169 (160-179)                | 169 (159-179)                | 0.96           |
| NO <sub>2</sub> (µg/m <sup>3</sup> ) <sup>a</sup>         | 25,639                     | 11.1 (5.5-26.8)              | 11.5 (5.8, 27.4)             | <0.001         |
| Road traffic noise, L <sub>den</sub> [dB(A)] <sup>b</sup> | 25,631                     | 57.3 (49.3-69.7)             | 57.5 (49.3, 69.8)            | 0.008          |
| Railway noise, L <sub>den</sub> [dB(A)] <sup>b</sup>      | 3,682                      | 51.1 (30.8-68.8)             | 51.3 (31.1, 68.6)            | 0.41           |
| Airport noise, L <sub>den</sub> [dB(A)] <sup>b</sup>      | 224                        | 50.0 (45.0-55.0)             | 50.0 (45.0, 60.0)            | <0.001         |

<sup>a</sup>P-values from Chi- square or T-Test.<sup>b</sup>Estimated for the 1<sup>st</sup> trimester.

**eTable 2.** Exposures Distribution During Each Trimester and the Full Pregnancy Periods.

|                                      | N      | Mean | SD   | P5   | P25  | P50  | P75  | P95  |
|--------------------------------------|--------|------|------|------|------|------|------|------|
| NO <sub>2</sub> (µg/m <sup>3</sup> ) |        |      |      |      |      |      |      |      |
| 1 <sup>st</sup> trimester            | 72,745 | 13.3 | 7.3  | 5.8  | 8.7  | 11.5 | 15.4 | 27.7 |
| 2 <sup>nd</sup> trimester            | 72,745 | 13.1 | 7.0  | 6.0  | 8.8  | 11.3 | 14.7 | 27.2 |
| 3 <sup>rd</sup> trimester            | 72,745 | 12.7 | 6.9  | 5.5  | 8.4  | 11.0 | 14.4 | 26.4 |
| Pregnancy                            | 72,745 | 13.0 | 6.6  | 7.1  | 9.2  | 11.0 | 14.0 | 26.6 |
| L <sub>den</sub> (road, dB)          |        |      |      |      |      |      |      |      |
| 1 <sup>st</sup> trimester            | 72,745 | 58.2 | 6.5  | 49.3 | 53.1 | 57.5 | 62.7 | 69.9 |
| 2 <sup>nd</sup> trimester            | 72,745 | 58.2 | 6.5  | 49.3 | 53.1 | 57.4 | 62.6 | 69.8 |
| 3 <sup>rd</sup> trimester            | 72,745 | 58.1 | 6.4  | 49.3 | 53.0 | 57.3 | 62.4 | 69.7 |
| Pregnancy                            | 72,745 | 58.3 | 6.4  | 49.5 | 53.3 | 57.6 | 62.7 | 69.8 |
| L <sub>den</sub> (railway, dB)       |        |      |      |      |      |      |      |      |
| 1 <sup>st</sup> trimester            | 12,351 | 50.6 | 12.2 | 31.1 | 44.1 | 51.3 | 58.6 | 68.6 |
| 2 <sup>nd</sup> trimester            | 12,077 | 50.7 | 12.1 | 31.3 | 44.3 | 51.4 | 58.6 | 68.6 |
| 3 <sup>rd</sup> trimester            | 11,788 | 50.8 | 12.0 | 31.9 | 44.4 | 51.4 | 58.6 | 68.6 |
| L <sub>den</sub> (airport, dB)       |        |      |      |      |      |      |      |      |
| 1 <sup>st</sup> trimester            | 760    | 50.2 | 4.7  | 45.0 | 45.0 | 50.0 | 55.0 | 60.0 |
| 2 <sup>nd</sup> trimester            | 776    | 50.3 | 4.7  | 45.0 | 45.0 | 50.0 | 55.0 | 60.0 |
| 3 <sup>rd</sup> trimester            | 801    | 50.3 | 4.7  | 45.0 | 45.0 | 50.0 | 55.0 | 60.0 |

**eTable 3. Spearman Rank Correlation Between Exposures and Exposure Periods.**

|                                  | 1 <sup>st</sup> trimester |                  | 2 <sup>nd</sup> trimester |                  | 3 <sup>rd</sup> trimester |                  | Full pregnancy  |                  |
|----------------------------------|---------------------------|------------------|---------------------------|------------------|---------------------------|------------------|-----------------|------------------|
|                                  | NO <sub>2</sub>           | L <sub>den</sub> | NO <sub>2</sub>           | L <sub>den</sub> | NO <sub>2</sub>           | L <sub>den</sub> | NO <sub>2</sub> | L <sub>den</sub> |
| Air pollution (NO <sub>2</sub> ) |                           |                  |                           |                  |                           |                  |                 |                  |
| 1 <sup>st</sup> trimester        | .                         | 0.44             | 0.63                      | 0.42             | 0.37                      | 0.39             | 0.43            | 0.43             |
| 2 <sup>nd</sup> trimester        | 0.63                      | 0.43             | .                         | 0.44             | 0.59                      | 0.41             | 0.89            | 0.44             |
| 3 <sup>rd</sup> trimester        | 0.38                      | 0.40             | 0.59                      | 0.42             | .                         | 0.43             | 0.75            | 0.42             |
| Full pregnancy                   | 0.79                      | 0.47             | 0.89                      | 0.47             | 0.75                      | 0.45             | .               | 0.49             |
| Road traffic (L <sub>den</sub> ) |                           |                  |                           |                  |                           |                  |                 |                  |
| 1 <sup>st</sup> trimester        | .                         | .                | .                         | .                | .                         | .                | 0.47            | .                |
| 2 <sup>nd</sup> trimester        | .                         | 0.96             | .                         | .                | .                         | .                | 0.47            | .                |
| 3 <sup>rd</sup> trimester        | .                         | 0.90             | .                         | 0.95             | .                         | .                | 0.45            | .                |
| Full pregnancy                   | .                         | 0.97             | .                         | 0.98             | .                         | 0.96             | 0.48            | .                |

**eTable 4.** Air Pollution And Road Traffic Noise in Further Adjusted Associations With Hypertensive Disorders In Pregnancy (N=72,745).

| Outcome                                            | NO <sub>2</sub>              |              |                             |              | L <sub>den</sub>             |              |                             |              |
|----------------------------------------------------|------------------------------|--------------|-----------------------------|--------------|------------------------------|--------------|-----------------------------|--------------|
|                                                    | Single-exposure <sup>a</sup> |              | Joint exposure <sup>b</sup> |              | Single-exposure <sup>a</sup> |              | Joint exposure <sup>b</sup> |              |
|                                                    | OR                           | (95% CI)     | OR                          | (95% CI)     | OR                           | (95% CI)     | OR                          | (95% CI)     |
| Preeclampsia (all subtypes)                        | 1.07                         | (1.01, 1.14) | 1.03                        | (0.96, 1.12) | 1.10                         | (1.03, 1.18) | 1.08                        | (0.99, 1.18) |
| Preeclampsia subtypes                              |                              |              |                             |              |                              |              |                             |              |
| Mild                                               | 1.13                         | (1.05, 1.21) | 1.09                        | (1.00, 1.18) | 1.31                         | (1.04, 1.23) | 1.07                        | (0.97, 1.18) |
| Severe                                             | 0.93                         | (0.81, 1.06) | 0.88                        | (0.75, 1.03) | 1.02                         | (0.88, 1.17) | 1.01                        | (0.93, 1.30) |
| Preeclampsia onset                                 |                              |              |                             |              |                              |              |                             |              |
| Early                                              | 1.16                         | (1.06, 1.28) | 1.10                        | (0.98, 1.24) | 1.19                         | (1.06, 1.34) | 1.11                        | (0.97, 1.28) |
| Late                                               | 1.02                         | (0.94, 1.11) | 0.99                        | (0.90, 1.09) | 1.05                         | (0.96, 1.15) | 1.06                        | (0.95, 1.18) |
| Gestational hypertension                           | 1.03                         | (0.93, 1.14) | 1.01                        | (0.90, 1.14) | 1.05                         | (0.94, 1.17) | 1.04                        | (0.91, 1.19) |
| Hypertensive disorders in pregnancy (all subtypes) | 1.07                         | (1.01, 1.13) | 1.04                        | (0.97, 1.11) | 1.09                         | (1.02, 1.16) | 1.06                        | (0.98, 1.14) |

<sup>a</sup>Associations are presented as odds ratio (OR) with 95% confidence intervals (CI) for the indicated outcomes estimated from logistic regression models per increment of 10 µg/m<sup>3</sup> for NO<sub>2</sub> and 10 dB(A) for road traffic noise in mean exposure during 1<sup>st</sup> trimester of gestation. Adjusted for maternal age, parity, pre-pregnancy BMI, height, disposable income, education, season of conception, maternal smoking, physical activity, railway and airport noise.

<sup>b</sup>NO<sub>2</sub>-models are further adjusted for L<sub>den</sub> while L<sub>den</sub>-models are mutually adjusted for NO<sub>2</sub>.

**eTable 5.** Ambient Air Pollution And Road Traffic Noise During Different Exposure-windows in Associations With Hypertensive Disorders In Pregnancy (N=72,745).

| Model                                              | OR <sup>a</sup> | NO <sub>2</sub><br>(95% CI) | L <sub>den</sub><br>OR <sup>a</sup> (95% CI) |
|----------------------------------------------------|-----------------|-----------------------------|----------------------------------------------|
| Preeclampsia (all subtypes)                        |                 |                             |                                              |
| 1 <sup>st</sup> trimester                          | 1.07            | (1.01, 1.14)                | 1.10 (1.02, 1.18)                            |
| 2 <sup>nd</sup> trimester                          | 1.07            | (1.00, 1.14)                | 1.09 (1.01, 1.17)                            |
| 3 <sup>rd</sup> trimester                          | 1.07            | (1.00, 1.14)                | 1.07 (0.99, 1.14)                            |
| Full pregnancy                                     | 1.08            | (1.01, 1.15)                | 1.08 (1.01, 1.16)                            |
| Mild preeclampsia                                  |                 |                             |                                              |
| 1 <sup>st</sup> trimester                          | 1.12            | (1.05, 1.20)                | 1.13 (1.04, 1.22)                            |
| 2 <sup>nd</sup> trimester                          | 1.12            | (1.04, 1.20)                | 1.13 (1.04, 1.23)                            |
| 3 <sup>rd</sup> trimester                          | 1.13            | (1.05, 1.22)                | 1.11 (1.03, 1.21)                            |
| Full pregnancy                                     | 1.14            | (1.06, 1.23)                | 1.12 (1.03, 1.22)                            |
| Severe preeclampsia                                |                 |                             |                                              |
| 1 <sup>st</sup> trimester                          | 0.92            | (0.81, 1.05)                | 1.01 (0.88, 1.16)                            |
| 2 <sup>nd</sup> trimester                          | 0.90            | (0.78, 1.04)                | 0.96 (0.84, 1.11)                            |
| 3 <sup>rd</sup> trimester                          | 0.88            | (0.76, 1.02)                | 0.93 (0.80, 1.07)                            |
| Full pregnancy                                     | 0.90            | (0.78, 1.04)                | 0.97 (0.84, 1.12)                            |
| Early-onset preeclampsia                           |                 |                             |                                              |
| 1 <sup>st</sup> trimester                          | 1.16            | (1.05, 1.27)                | 1.18 (1.06, 1.33)                            |
| 2 <sup>nd</sup> trimester                          | 1.16            | (1.05, 1.28)                | 1.18 (1.05, 1.32)                            |
| 3 <sup>rd</sup> trimester                          | 1.19            | (1.08, 1.31)                | 1.18 (1.05, 1.33)                            |
| Full pregnancy                                     | 1.19            | (1.07, 1.32)                | 1.18 (1.05, 1.33)                            |
| Late-onset preeclampsia                            |                 |                             |                                              |
| 1 <sup>st</sup> trimester                          | 1.02            | (0.94, 1.10)                | 1.05 (0.96, 1.15)                            |
| 2 <sup>nd</sup> trimester                          | 1.01            | (0.93, 1.10)                | 1.04 (0.95, 1.13)                            |
| 3 <sup>rd</sup> trimester                          | 0.99            | (0.91, 1.08)                | 1.00 (0.92, 1.10)                            |
| Full pregnancy                                     | 1.01            | (0.93, 1.10)                | 1.03 (0.94, 1.12)                            |
| Gestational hypertension                           |                 |                             |                                              |
| 1 <sup>st</sup> trimester                          | 1.03            | (0.93, 1.14)                | 1.05 (0.96, 1.15)                            |
| 2 <sup>nd</sup> trimester                          | 1.00            | (0.90, 1.11)                | 1.01 (0.91, 1.13)                            |
| 3 <sup>rd</sup> trimester                          | 1.01            | (0.91, 1.13)                | 1.00 (0.89, 1.11)                            |
| Full pregnancy                                     | 1.01            | (0.91, 1.13)                | 1.02 (0.91, 1.14)                            |
| Hypertensive disorders in pregnancy (all subtypes) |                 |                             |                                              |
| 1 <sup>st</sup> trimester                          | 1.07            | (1.01, 1.13)                | 1.08 (1.02, 1.15)                            |
| 2 <sup>nd</sup> trimester                          | 1.06            | (1.00, 1.12)                | 1.07 (1.00, 1.14)                            |
| 3 <sup>rd</sup> trimester                          | 1.06            | (1.00, 1.12)                | 1.05 (0.98, 1.12)                            |
| Full pregnancy                                     | 1.07            | (1.01, 1.14)                | 1.06 (1.00, 1.13)                            |

<sup>a</sup>Associations are presented as odds ratio (OR) with 95% confidence intervals (CI) for the indicated pregnancy outcomes from logistic regression models with adjustment for maternal age, parity, pre-pregnancy BMI, height, disposable income, education and season of conception per increment 10 µg/m<sup>3</sup> for NO<sub>2</sub> and 10 dB(A) for road traffic noise in mean exposure during the indicated periods.

**table 6.** Exposure to Railway Noise And Hypertensive Disorders In Pregnancy (N=72,745).

| Outcome                                            | n <sup>d</sup> | Unadjusted <sup>a</sup> |              | Adjusted <sup>b</sup> |              | Joint exposure <sup>c</sup> |              |
|----------------------------------------------------|----------------|-------------------------|--------------|-----------------------|--------------|-----------------------------|--------------|
|                                                    |                | OR                      | (95% CI)     | OR                    | (95% CI)     | OR                          | (95% CI)     |
| Preeclampsia (all subtypes)                        | 1,880          | 0.98                    | (0.90, 1.08) | 0.97                  | (0.95, 1.00) | 0.98                        | (0.90, 1.08) |
| Preeclampsia subtypes                              |                |                         |              |                       |              |                             |              |
| Mild                                               | 1,393          | 1.00                    | (0.89, 1.12) | 0.98                  | (0.95, 1.00) | 1.00                        | (0.90, 1.12) |
| Severe                                             | 487            | 0.93                    | (0.78, 1.12) | 0.94                  | (0.79, 1.13) | 0.94                        | (0.79, 1.13) |
| Preeclampsia onset                                 |                |                         |              |                       |              |                             |              |
| Early                                              | 671            | 0.92                    | (0.79, 1.07) | 0.93                  | (0.79, 1.08) | 0.93                        | (0.79, 1.07) |
| Late                                               | 1,209          | 1.02                    | (0.91, 1.15) | 1.03                  | (0.91, 1.16) | 1.03                        | (0.91, 1.15) |
| Gestational hypertension                           | 765            | 1.01                    | (0.86, 1.18) | 1.01                  | (0.87, 1.18) | 1.01                        | (0.87, 1.18) |
| Hypertensive disorders in pregnancy (all subtypes) | 2,430          | 0.99                    | (0.91, 1.08) | 1.00                  | (0.92, 1.09) | 1.00                        | (0.92, 1.08) |

<sup>a</sup>Associations are presented as odds ratio (OR) with 95% confidence intervals (CI) for the indicated outcomes estimated from logistic regression models per increment of 10 dB(A) for railway traffic noise in mean exposure during 1<sup>st</sup> trimester of gestation.

<sup>b</sup>Adjusted for maternal age, parity, pre-pregnancy BMI, height, disposable income, education and season of conception.

<sup>c</sup>Further adjusted for road traffic noise  $L_{den}$ .

<sup>d</sup>Number of cases.

**etable 7.** Sensitivity Analysis For Mild Preeclampsia.

| Analysis                                           | N <sup>c</sup> | n <sup>d</sup> | NO <sub>2</sub>                             |                                           | Lden                                       |                                           |
|----------------------------------------------------|----------------|----------------|---------------------------------------------|-------------------------------------------|--------------------------------------------|-------------------------------------------|
|                                                    |                |                | Single-exposure <sup>a</sup><br>OR (95% CI) | Joint exposure <sup>b</sup><br>OR(95% CI) | Single-exposure <sup>a</sup><br>OR(95% CI) | Joint exposure <sup>b</sup><br>OR(95% CI) |
| As reported in Table 2                             | 72,258         | 1,393          | 1.12 (1.05, 1.20)                           | 1.09 (1.00, 1.18)                         | 1.13 (1.04, 1.22)                          | 1.07 (0.97, 1.18)                         |
| Further adjusted for gestational diabetes mellitus | 72,258         | 1,393          | 1.12 (1.05, 1.20)                           | 1.09 (1.00, 1.18)                         | 1.13 (1.04, 1.22)                          | 1.07 (0.97, 1.18)                         |
| Excluding women with previous preeclampsia         | 72,258         | 1,393          | 1.12 (1.05, 1.21)                           | 1.09 (1.00, 1.19)                         | 1.12 (1.04, 1.22)                          | 1.06 (0.96, 1.17)                         |
| Excluding women with unknown temperature           | 72,258         | 1,393          | 1.14 (1.06, 1.22)                           | 1.09 (1.00, 1.19)                         | 1.12 (1.03, 1.22)                          | 1.06 (0.95, 1.17)                         |
| Further adjusted for temperature                   | 72,258         | 1,393          | 1.12 (1.05, 1.20)                           | 1.11 (1.02, 1.21)                         | 1.12 (1.03, 1.22)                          | 1.05 (0.94, 1.16)                         |
| Including women with pre-existing hypertension     | 72,437         | 1,407          | 1.12 (1.05, 1.20)                           | 1.08 (0.99, 1.18)                         | 1.13 (1.04, 1.23)                          | 1.07 (0.97, 1.19)                         |

<sup>a</sup>Associations are presented as odds ratio (OR) with 95% confidence intervals (CI) for the indicated pregnancy outcomes estimated from logistic regression models per increment of 10 µg/m<sup>3</sup> for NO<sub>2</sub> and 10 dB(A) for road traffic noise in mean exposure during 1<sup>st</sup> trimester of gestation adjusted for maternal age, parity, pre-pregnancy BMI, height, disposable income, education and season of conception.

<sup>b</sup>NO<sub>2</sub>-models are further adjusted for L<sub>den</sub> while L<sub>den</sub>-models are mutually adjusted for NO<sub>2</sub>.

<sup>c</sup>Total number in the model.

<sup>d</sup>Number of cases.

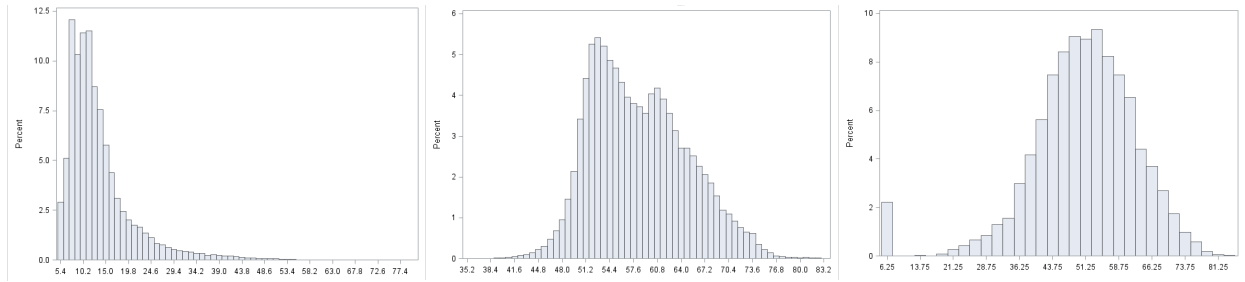

Figure 1. The distribution of NO<sub>2</sub> (left,  $\mu\text{g}/\text{m}^3$ ), L<sub>den</sub> (middle, dB) and railway noise (right, dB) during the 1<sup>st</sup> trimester.
